# Supplementary material for: Comparative analysis of the complete chloroplast genome of Papaveraceae to identify rearrangements within the Corydalis chloroplast genome
Source: PLoS One. 2023 Sep 21;18(9):e0289625. doi: 10.1371/journal.pone.0289625 (PMC10513226; doi:10.1371/journal.pone.0289625)
Supplement: S3 Table — (XLSX) [file pone.0289625.s018.xlsx]

## Sheet: Sheet1
Scientific name	Accession number
Corydalis hsiaowutaishanensis T.P.Wang	MT920561
Corydalis conspersa Maxim.	MN843953
Corydalis inopinata Prain ex Fedde	MT755641
Corydalis trisecta Franch.	MN654110
Corydalis davidii Franch.	MT920560
Corydalis chrysosphaera Marquand & Airy Shaw	MZ983401
Corydalis temulifolia Franch.	MT920558
Corydalis shensiana Lidén ex C.Y.Wu, H.Chuang & Z.Y.Su	MW110634
Corydalis edulis Maxim.	MW110633
Corydalis fangshanensis W.T.Wang	MZ440305
Corydalis tomentella Franch.	MT077878
Corydalis saxicola Bunting	MT920562
Corydalis adunca Maxim.	MT920559
Lamprocapnos spectabilis (L.) Fukuhara	MG873498
Papaver nudicaule L.	MW151698
Stylophorum lasiocarpum (Oliv.) Fedde	MW232434
Meconopsis integrifolia (Maxim.) Franch.	MK533647
Chelidonium majus L.	MK433200
Coreanomecon hylomeconoides Nakai	KT274030
Macleaya cordata (Willd.) R.Br.	MT178411
Eschscholzia californica Cham.	MK281585
Euptelea pleiosperma Hook.f. & Thomson	KU204900
